# Supplementary material
Source: publisher site journal article supplement (https://www.dovepress.com/article/83441)
Supplement: Supplementary file 1 [file get_supplementary_file.php]

**Table 1** List of plants of Mallur hills with vernacular name, habit, life-form and the potential use

|    | Family (APG III sequence)/<br>Botanical name          | Vernacular name | Habit            | Life-form           | Primary Use                        |
|----|-------------------------------------------------------|-----------------|------------------|---------------------|------------------------------------|
|    | <b>Nymphaeaceae (4)</b>                               |                 |                  |                     |                                    |
| 1  | <i>Nymphaea nouchali</i> Burm.f.                      | Kaluva          | Herb<br>(Runner) | Tuber hydrogeophyte | Edible (T), forage                 |
|    | <b>Aristolochiaceae (15)</b>                          |                 |                  |                     |                                    |
| 2  | <i>Aristolochia bracteolata</i> Lam.                  | Nalleswari      | Twiner           | Therophyte          | Purgative, worm killer (Wh)        |
| 3  | <i>Aristolochia indica</i> L.                         | Gadida gadapa   | Twiner           | Chamaephyte         | Snake-bite (R)                     |
|    | <b>Annonaceae (21)</b>                                |                 |                  |                     |                                    |
| 4  | * <i>Annona squamosa</i> L.                           | Sheetal phal    | Tree             | Nanophanerophyte    | Edible (F), anti-lice (Sb)         |
| 5  | <i>Miliusa tomentosa</i> (Roxb.)<br>J.Sinclair        | Barre dudduga   | Tree             | Phanerophyte        | Building huts (W)                  |
| 6  | <i>Miliusa velutina</i> (A.DC.) Hook.f.<br>& Thnomsom | Nalla dudduga   | Tree             | Phanerophyte        | Agricultural implements (W)        |
| 7  | <i>Polyalthia cerasoides</i> (Roxb.)<br>Bedd.         | Chiluka dudduga | Tree             | Nanophanerophyte    | Carpentary (W)                     |
|    | <b>Lauraceae (28)</b>                                 |                 |                  |                     |                                    |
| 8  | <i>Litsea glutinosa</i> (Lour.) C.B.Rob.              | Narra mamidi    | Tree             | Phanerophyte        | Bone fracture (Sb)                 |
|    | <b>Araceae (30)</b>                                   |                 |                  |                     |                                    |
| 9  | <i>Colocasia esculenta</i> (L.) Schott                | Adavi chema     | Herb             | Corm geophyte       | Edible (corm), juice as hair tonic |
| 10 | * <i>Pistia stratiotes</i> L.                         | Anthara thamara | Herb             | Floating Hydrophyte | Diuretic, laxative (R)             |
| 11 | <i>Therioophonum minutum</i> (Willd.)<br>Baill.       | Adavi champa    | Herb             | Tuber geophyte      | Tuber boiled with tamarind. cooked |
|    | <b>Aponogetonaceae (36)</b>                           |                 |                  |                     |                                    |
| 12 | <i>Aponogeton natans</i> (L.) Engl. &<br>K.Krause     | Nama dumpa      | Herb             | Tuber hydrogeophyte | Edible, animal feed (Rh)           |

|                            |                                                 |                      |              |                      |                                           |
|----------------------------|-------------------------------------------------|----------------------|--------------|----------------------|-------------------------------------------|
| <b>Dioscoreaceae (46)</b>  |                                                 |                      |              |                      |                                           |
| 13                         | <i>Dioscorea alata</i> L.                       | Bellam gadda         | Twiner       | Tuber geophyte       | Edible (T)                                |
| 14                         | <i>Dioscorea bulbifera</i> L.                   | Nalla/Chenna gadda   | Twiner       | Tuber geophyte       | Edible (T); aerial bulbs edible           |
| 15                         | <i>Dioscorea oppositifolia</i> L.               | Yella gadda          | Twiner       | Tuber geophyte       | Edible (T)                                |
| 16                         | <i>Dioscorea pentaphylla</i> L.                 | Govinda gadda        | Twiner       | Tuber geophyte       | Edible (T)                                |
| <b>Stemonaceae (49)</b>    |                                                 |                      |              |                      |                                           |
| 17                         | <i>Stemona tuberosa</i> Lour.                   | Kanepu teega         | Twiner       | Tuber geophyte       | Fever (T)                                 |
| <b>Colchicaceae (56)</b>   |                                                 |                      |              |                      |                                           |
| 18                         | <i>Gloriosa superba</i> L.                      | Naabhi               | Leaf twiner  | Corm geophyte        | Paste to cure leprosy (corm)              |
| 19                         | <i>Iphigenia indica</i> (L.) A. Gray ex Kunth   | Kaki katuka          | Herb         | Tuber geophyte       | Colchicine, anti-gout (T)                 |
| <b>Smilacaceae (59)</b>    |                                                 |                      |              |                      |                                           |
| 20                         | <i>Smilax perfoliata</i> Lour.                  | Konda guruva teega   | Twiner       | Rhizome geophyte     | Aphrodisiac, cooked (Rh)                  |
| 21                         | <i>Smilax zeylanica</i> L.                      | Kantasara theega     | Twiner       | Rhizome geophyte     | Aphrodisiac, cooked (Rh)                  |
| <b>Orchidaceae (62)</b>    |                                                 |                      |              |                      |                                           |
| 22                         | <i>Geodorum densiflorum</i> (Lam.) Schltr.      | Donthula dumpa       | Herb         | Pseudo-bulb geophyte | Extract insect bite, ephemeral fever (Pb) |
| 23                         | <i>Habenaria roxburghii</i> Nicolson            | Pasupu suddulu gadda | Herb         | Tuber geophyte       | Extract snake-bite (T)                    |
| 24                         | <i>Vanda tessellata</i> (Roxb.) Hook. ex G. Don | Kodikalla chettu     | Herb         | Epiphyte             | Fever, rheumatism (R)                     |
| <b>Hypoxidaceae (67)</b>   |                                                 |                      |              |                      |                                           |
| 25                         | <i>Curculigo orchioides</i> Gaertn.             | Nela thadi           | Herb         | Rhizome geophyte     | Aphrodisiac, food for wild pigs (Rh)      |
| <b>Amaryllidaceae (74)</b> |                                                 |                      |              |                      |                                           |
| 26                         | <i>Crinum latifolium</i> L.                     | Penjari gadda        | Shrub        | Bulb geophyte        | Wounds healing (B)                        |
| <b>Asparagaceae (75)</b>   |                                                 |                      |              |                      |                                           |
| 27                         | <i>Asparagus gonocladus</i> Baker               | Guddelugu bochu      | Stem climber | Tuber geophyte       | Aphrodisiac (R)                           |

|                            |                                                     |                    |              |                  |                                             |
|----------------------------|-----------------------------------------------------|--------------------|--------------|------------------|---------------------------------------------|
| 28                         | <i>Asparagus racemosus</i> Willd.                   | Pilli teegalu      | Stem climber | Tuber geophyte   | Aphrodisiac (R)                             |
| 29                         | <i>Chlorophytum tuberosum</i> (Roxb.) Baker         | Sarala pagada      | Herb         | Tuber geophyte   | Aphrodisiac (R), vegetable (Fl)             |
| 30                         | <i>Drimia indica</i> (Roxb.) Jessop                 | Adavi ulligadda    | Herb         | Bulb geophyte    | Aphrodisiac (B)                             |
| 31                         | <i>Ledebouria hyacinthoides</i> Roth                | Adavi chinna ulli  | Herb         | Bulb geophyte    | Aphrodisiac (B)                             |
| <b>Arecaceae (76)</b>      |                                                     |                    |              |                  |                                             |
| 32                         | * <i>Borassus flabellifer</i> L.                    | Thati              | Tree         | Phanerophyte     | Thatching (L), toddy tapping, edible (F, S) |
| 33                         | <i>Chamaerops humilis</i> L.                        | Juttu thati        | Shrub        | Hemicryptophyte  | Manufacture of carpets (L)                  |
| 34                         | <i>Phoenix loureiroi</i> Kunth                      | Jittetha, kondetha | Tree         | Phanerophyte     | Thatching (L), toddy tapping, edible (F)    |
| <b>Commelinaceae (78)</b>  |                                                     |                    |              |                  |                                             |
| 35                         | <i>Murdannia semiteres</i> (Dalz.) Santapau         |                    | Herb         | Therophyte       | Forage                                      |
| <b>Pontederiaceae (80)</b> |                                                     |                    |              |                  |                                             |
| 36                         | <i>Monochoria vaginalis</i> (Burm.f.) C.Presl       | Neeti thamara      | Herb         | Hemicryptophyte  | Fodder                                      |
| <b>Costaceae (88)</b>      |                                                     |                    |              |                  |                                             |
| 37                         | <i>Cheilocostus speciosus</i> (J.Koenig) C.D.Specht | Chengalva gadda    | Herb         | Rhizome geophyte | Cure chicken-pox, asthma (Rh)               |
| <b>Zingiberaceae (89)</b>  |                                                     |                    |              |                  |                                             |
| 38                         | <i>Curcuma inodora</i> Blatt.                       | Adavi pasupu       | Herb         | Rhizome geophyte | Antiseptic (Rh)                             |
| 39                         | <i>Globba marantina</i> L.                          | Konda pasupu       | Herb         | Hemicryptophyte  | Cure asthma, ear-ache (T)                   |
| <b>Eriocaulaceae (95)</b>  |                                                     |                    |              |                  |                                             |
| 40                         | <i>Eriocaulon cinereum</i> R.Br.                    | Gaddi puvvu        | Herb         | Therophyte       | Manure (Wh)                                 |
| <b>Cyperaceae (99)</b>     |                                                     |                    |              |                  |                                             |
| 41                         | <i>Bulbostylis barbata</i> (Rottb.) C.B.Clarke      | Thunga             | Herb         | Therophyte       | Forage                                      |
| 42                         | <i>Cyperus cyperinus</i> (Retz.) Suringar           | Thunga             | Herb         | Rhizome geophyte | Forage                                      |

|                              |                                                          |                           |                 |                              |                                              |
|------------------------------|----------------------------------------------------------|---------------------------|-----------------|------------------------------|----------------------------------------------|
| 43                           | <i>Cyperus diffusus</i> Vahl                             | Thunga                    | Herb            | Therophyte                   | Forage                                       |
| 44                           | <i>Cyperus haspan</i> L.                                 | Thunga                    | Herb            | Therophyte                   | Forage                                       |
| 45                           | <i>Cyperus iria</i> L.                                   | Thunga                    | Herb            | Therophyte                   | Forage                                       |
| 46                           | <i>Cyperus niveus</i> Retz.                              | Thunga                    | Herb            | Rhizome geophyte             | Forage                                       |
| 47                           | <i>Cyperus rotundus</i> L.                               | Thunga                    | Herb            | Tuber geophyte               | Scorpion bite (T)                            |
| 48                           | <i>Fimbristylis aestivalis</i> Vahl                      | Thunga                    | Herb            | Therophyte                   | Forage                                       |
| 49                           | <i>Fimbristylis eragrostis</i> (Nees)<br>Hance           | Thunga                    | Herb            | Therophyte                   | Forage                                       |
| 50                           | <i>Fimbristylis ovata</i> (Burm.f.)<br>J.Kern            | Thunga                    | Herb            | Therophyte                   | Forage                                       |
| 51                           | <i>Fuirena ciliaris</i> (L.) Roxb.                       | Thunga                    | Herb            | Therophyte                   | Manure (Wh)                                  |
| 52                           | <i>Kyllinga odorata</i> Vahl                             | Thunga                    | Herb            | Rhizome geophyte             | Diuretic (Rh)                                |
| 53                           | <i>Schoenoplectiella articulata</i> (L.)<br>Lye          | Arala thunga              | Herb            | Therophyte                   | Forage                                       |
| 54                           | <i>Scleria corymbosa</i> Roxb.                           | Ashta medha               | Herb            | Hemicryptophyte              | Blood purifier (L)                           |
| <b>Flagellariaceae (103)</b> |                                                          |                           |                 |                              |                                              |
| 55                           | <i>Flagellaria indica</i> L.                             | Aku ukku, Kokkem<br>teega | Leaf<br>climber | Chamaephyte                  | Induce sterility (L)                         |
| <b>Poaceae (106)</b>         |                                                          |                           |                 |                              |                                              |
| 56                           | <i>Bambusa bambos</i> (L.) Voss                          | Bongu, Veduru             | Tree            | Rhizome geophyte<br>(Bamboo) | Making baskets, household articles<br>(Culm) |
| 57                           | <i>Cymbopogon citratus</i> (DC.) Stapf<br>(lemon grass)  | Nimma gaddi               | Shrub           | Chamaephyte                  | Oil medicinal (L)                            |
| 58                           | <i>Cymbopogon flexuosus</i> (Nees ex<br>Steud.) W.Watson | Nimma gaddi               | Shrub           | Chamaephyte                  | Oil medicinal (L)                            |
| 59                           | <i>Cynodon dactylon</i> (L.) Pers.                       | Garika                    | Herb            | Therophyte                   | Diuretic, fodder (L)                         |
| 60                           | <i>Dactyloctenium aegyptium</i> (L.)<br>Willd.           | Chikara gaddi             | Herb            | Therophyte                   | Forage (L)                                   |
| 61                           | <i>Dendrocalamus strictus</i> (Roxb.)                    | Bongu, Veduru             | Tree            | Rhizome geophyte             | Making baskets, household articles           |

|                             |                                                           |                        |                       |                  |                             |
|-----------------------------|-----------------------------------------------------------|------------------------|-----------------------|------------------|-----------------------------|
|                             | Nees                                                      |                        |                       | (Bamboo)         | (Culm)                      |
| 62                          | <i>Echinochloa crus-galli</i> (L.)<br>P.Beauv.            | Pedda undu             | Herb                  | Therophyte       | Forage (L)                  |
| 63                          | <i>Eragrostis unioloides</i> (Retz.) Nees<br>ex Steud.    | Buruga gaddi           | Herb                  | Therophyte       | Forage (L)                  |
| 64                          | <i>Porteresia coarctata</i> (Roxb.)<br>Tateoka            | Vari                   | Herb                  | Therophyte       | Forage (L), grains as rice  |
| 65                          | <i>Thysanolaena latifolia</i> (Roxb. ex<br>Hornem.) Honda | Cheepuru gaddi         | Herb                  | Chamaephyte      | Brooms (Wh)                 |
| <b>Papaveraceae (109)</b>   |                                                           |                        |                       |                  |                             |
| 66                          | * <i>Argemone mexicana</i> L.                             | Mulu paccha            | Herb                  | Therophyte       | Skin disease (Wh)           |
| <b>Menispermaceae (112)</b> |                                                           |                        |                       |                  |                             |
| 67                          | <i>Cissampelos pareira</i> L.                             | Visha boddi            | Twiner                | Chamaephyte      | Stomach pain (R)            |
| 68                          | <i>Cocculus hirsutus</i> (L.) W.Theob.                    | Shibbi teega           | Twiner                | Chamaephyte      | Baskets (Wh)                |
| 69                          | <i>Tinospora cordifolia</i> (Willd.)<br>Miers             | Tippa teega            | Twiner                | Chamaephyte      | Strength (St)               |
| <b>Dilleniaceae (124)</b>   |                                                           |                        |                       |                  |                             |
| 70                          | <i>Dillenia pentagyna</i> Roxb.                           | Chinna kalinga         | Tree                  | Mesophanerophyte | Fever (Sb)                  |
| <b>Vitaceae (140)</b>       |                                                           |                        |                       |                  |                             |
| 71                          | <i>Ampelocissus latifolia</i> (Roxb.)<br>Planch.          | Dobba teega            | Tendrillar<br>climber | Chamaephyte      | Anorexia (St)               |
| 72                          | <i>Ampelocissus tomentosa</i> (B.Heyne<br>& Roth) Planch. | Lolugu teega           | Tendrillar<br>climber | Chamaephyte      | Edible (F)                  |
| 73                          | <i>Cayratia pedata</i> (Lam.) Gagnep.                     | Edakula<br>mandulamari | Tendrillar<br>climber | Chamaephyte      | Veneral diseases (L)        |
| 74                          | <i>Cissus adnata</i> Roxb.                                | Kokkitayaralu          | Tendrillar<br>climber | Chamaephyte      | Diuretic (T)                |
| 75                          | <i>Cissus vitiginea</i> L.                                | Adavi draksha          | Tendrillar<br>climber | Chamaephyte      | Edible for stomach-ache (F) |
| 76                          | <i>Leea indica</i> (Burm.f.) Merr.                        | Velama sandi,          | Shrub                 | Nanophanerophyte | Skin disease (R)            |

amkador

**Zygophyllaceae (142)**

77 *Tribulus lanuginosus* L. Palleru Herb Therophyte Venereal (L), urinary diseases (F)

**Fabaceae/Leguminosae (144)**

78 *Abrus precatorius* L. Gurivinda, Gurija Twiner Chamaephyte Ornamental, abortifacient (S)

79 *Acacia chundra* (Rottler) Willd. Sandra Tree Phanerophyte Agricultural implements (W)

80 *Acacia horrida* (L.) Willd. Thumma Tree Phanerophyte Fodder

81 *Acacia leucophloea* (Roxb.) Willd. Tella tumma Tree Phanerophyte Gum, agricultural implements (W)

82 *Acacia nilotica* (L.) Delile Nalla tumma Tree Phanerophyte Gum, agricultural implements (W)

83 *Acacia pennata* (L.) Willd. Korinda Stem climber Chamaephyte Fits (Sb)

84 *Acacia sinuata* (Lour.) Merr. Valuga palla chettu Stem climber Chamaephyte Vegetable (L)

85 *\*Albizia lebbek* (L.) Benth. Dirisena Tree Mesophanerophyte Fodder

86 *Albizia odoratissima* (L.f.) Benth. Chinduga Tree Mesophanerophyte Fodder

87 *Albizia procera* (Roxb.) Benth. Choppari, Tella chinduga Tree Mesophanerophyte Rheumatism (Sb)

88 *Alysicarpus monilifer* (L.) DC. Amera Herb Therophyte Forage

89 *Alysicarpus rugosus* (Willd.) DC. - Herb Therophyte Forage

90 *Alysicarpus vaginalis* (L.) DC. - Herb Therophyte Forage

91 *Bauhinia purpurea* L. Devakanchanam Tree Phanerophyte Diarrhoea (Sb)

92 *Bauhinia racemosa* Lam. Are, Adavi kanchanam Tree Phanerophyte Fibre (Sb)

93 *Bauhinia semla* Wunderlin Avise Tree Phanerophyte Tonic (Sb)

94 *Bauhinia vahlii* Wight & Arn. Addaku S/Tendrill climber Liana Meal plates (L), edible (F)

95 *¥Butea monosperma* Roxb. Moduga Tree Phanerophyte Meal plates (L)

96 *Butea superba* Roxb. Teega moduga Stem Liana Meal plates (L)

|     |                                                                         |                                 |                 |                  |                                      |
|-----|-------------------------------------------------------------------------|---------------------------------|-----------------|------------------|--------------------------------------|
|     |                                                                         |                                 | climber         |                  |                                      |
| 97  | <i>Cajanus scarabaeoides</i> (L.)<br>Thouars                            | Adavi kandi                     | Twiner          | Therophyte       | Vegetable, edibe (S)                 |
| 98  | <i>Canavalia cathartica</i> Thouars                                     | Adavi chemma                    | Twiner          | Therophyte       | Scorpion bite (S)                    |
| 99  | <i>Cassia fistula</i> L.                                                | Rela                            | Tree            | Phanerophyte     | Timber (W)                           |
| 100 | <i>Crotalaria albida</i> Roth                                           | Adavi janumu                    | Herb            | Therophyte       | Scorpion bite (R)                    |
| 101 | <i>Crotalaria incana</i> L.                                             | Adavi janumu                    | Herb            | Therophyte       | Forage                               |
| 102 | <sup>†</sup> <i>Crotalaria juncea</i> L.                                | Janumu                          | Herb            | Therophyte       | Forage, wounds (L)                   |
| 103 | <i>Crotalaria medicaginea</i> Lam.                                      | Konda janumu                    | Herb            | Therophyte       | Rheumatism (L)                       |
| 104 | <i>Crotalaria ramosissima</i> Roxb.                                     | Tella janumu<br>Giligicha kaya, | Herb            | Therophyte       | Wounds, throat disease of cattle (L) |
| 105 | <i>Crotalaria verrucosa</i> L.                                          | Tella junumu                    | Herb            | Therophyte       | Snake bite (R)                       |
| 106 | <i>Dalbergia lanceolaria</i> subsp.<br><i>paniculata</i> (Roxb.) Thoth. | Patchari                        | Tree            | Phanerophyte     | Baldness (Sb)                        |
| 107 | <i>Dalbergia latifolia</i> Roxb.                                        | Jitregi                         | Tree<br>Stem    | Megaphanerophyte | Valuable, furniture (W)              |
| 108 | <i>Dalbergia volubilis</i> Roxb.                                        | Teega patchari                  | climber<br>Stem | Liana            | Skin disease (Sb)                    |
| 109 | <i>Derris scandens</i> (Roxb.) Benth.                                   | Chakali teega                   | climber         | Liana            | Veterinary (Sb)                      |
| 110 | <i>Desmodium adscendens</i> (Sw.) DC.                                   | -                               | Twiner          | Therophyte       | Manure (Wh)                          |
| 111 | <i>Desmodium gangeticum</i> (L.) DC.                                    | Konda saru                      | Herb            | Therophyte       | Scorpion bite (R)                    |
| 112 | <i>Desmodium heterocarpon</i> (L.)<br>DC.                               | Cheppu thatta                   | Herb            | Therophyte       | Cough (Wh)                           |
| 113 | <i>Desmodium triflorum</i> (L.) DC.                                     | Munta mandu                     | Herb            | Therophyte       | Hemorrhage (R)                       |
| 114 | <i>Desmodium velutinum</i> (Willd.)<br>DC.                              | Teega velaga                    | Twiner          | Therophyte       | Scorpion bite (R)                    |

|     |                                                                       |                      |             |                  |                                                                                |
|-----|-----------------------------------------------------------------------|----------------------|-------------|------------------|--------------------------------------------------------------------------------|
| 115 | <i>Dichrostachys cinerea</i> (L.) Wight & Arn.                        | Veluturu chettu      | Tree        | Nanophanerophyte | Fuel (W)                                                                       |
| 116 | <i>Dysolobium pilosum</i> (Willd.) Marechal                           | Noogu adavi chikkudu | Twiner      | Phanerophyte     | Fodder                                                                         |
| 117 | <i>Erythrina suberosa</i> Roxb.                                       | Muli moduga          | Tree        | Phanerophyte     | Appetite stimulant (Sb)                                                        |
| 118 | <i>Flemingia macrophylla</i> (Willd.) Merr.                           | Erri puvvu           | Shrub       | Chamaephyte      | Skin disease (R)                                                               |
| 119 | <i>Flemingia strobilifera</i> (L.) W.T.Aiton                          | Adavi chappa         | Shrub       | Chamaephyte      | Skin disease (R)<br>Construction, flag pole in temples (W),<br>veterinary (Sb) |
| 120 | <i>Hardwickia binata</i> Roxb.                                        | Narepa               | Tree        | Phanerophyte     | Scorpion bite (R)                                                              |
| 121 | <i>Indigofera cassioides</i> DC.                                      | Karu kandi           | Herb        | Therophyte       | Manure (Wh)                                                                    |
| 122 | <i>Indigofera linnaei</i> Ali                                         | Yerra palleru        | Herb        | Therophyte       | Manure (Wh)                                                                    |
| 123 | <i>Indigofera tinctoria</i> L.                                        | Neeli mokka          | Herb        | Therophyte       | Aphrodisiac (S)                                                                |
| 124 | <i>Indigofera trifoliata</i> L.                                       | Baragadamu           | Herb        | Therophyte       | Aphrodisiac (Sb)                                                               |
| 125 | <i>Mimosa hamata</i> Willd.                                           | Magadadi             | Tree        | Nanophanerophyte | Vermifuse to cattle                                                            |
| 126 | <i>Mucuna pruriens</i> (L.) DC.                                       | Dula gondi           | Twiner      | Therophyte       | Vermifuse to cattle                                                            |
| 127 | <i>Mucuna pruriens</i> var. <i>hirsuta</i> (Wight & Arn.) Wilmot-Dear | Dula gondi           | Twiner      | Therophyte       | Skin disease (R)                                                               |
| 128 | <i>Paraclayx scariosus</i> (Roxb.) Ali                                | Adavi tella kandi    | Twiner      | Therophyte       | Scorpion bite (R)                                                              |
| 129 | <i>Phyllodium pulchellum</i> (L.) Desv.                               | Sarivi               | Under shrub | Therophyte       | Oil (S)                                                                        |
| 130 | <i>Pongamia pinnata</i> (L.) Pierre                                   | Kanuga               | Tree        | Phanerophyte     | Rheumatism (R)                                                                 |
| 131 | <i>Pseudarthria viscida</i> (L.) Wight & Arn.                         | Nayaku ponna         | Herb        | Therophyte       | Agricultural implements (W)                                                    |
| 132 | <i>Pterocarpus marsupium</i> Roxb.                                    | Peddegi              | Tree        | Mesophanerophyte | Digestion (T)                                                                  |
| 133 | <i>Pueraria tuberosa</i> (Willd.) DC.                                 | Nela gummadi         | Twiner      | Chamaephyte      |                                                                                |



|                           |                                                      |                   |           |                  |                                       |
|---------------------------|------------------------------------------------------|-------------------|-----------|------------------|---------------------------------------|
| 134                       | <i>Rhyncosia suaveolens</i> (L.f.) DC.               | Adavi kandi       | Twiner    | Therophyte       | Dysentery (S)                         |
| 135                       | <i>Senna absus</i> (L.) Roxb.                        | Chanupala vittulu | Herb      | Therophyte       | Skin disease (S)                      |
| 136                       | * <i>Senna alata</i> (L.) Roxb.                      | Thamara chettu    | Shrub     | Nanophanerophyte | Skin disease (L)                      |
| 137                       | * <i>Senna auriculata</i> (L.) Roxb.                 | Thangedu          | Shrub     | Nanophanerophyte | Worship (Fl), tanneries (B)           |
| 138                       | * <i>Senna obtusifolia</i> (L.) H.S.Irwin & Barneby  | Tagarisa          | Herb      | Therophyte       | Insect bite (L)                       |
| 139                       | * <i>Senna occidentalis</i> (L.) Link                | Penta chennangi   | Herb      | Therophyte       | Appetite stimulant (F), purgative (R) |
| 140                       | * <i>Senna tora</i> (L.) Roxb.                       | Thagarisa         | Herb      | Therophyte       | Insect bite (L)                       |
| 141                       | * <i>Senna uniflora</i> (Mill.) H.S. Irwin & Barneby | -                 | Herb      | Therophyte       | Manure (Wh)                           |
| 142                       | <i>Sophora velutina</i> Lindl.                       | Adavi kanuga      | Shrub     | Chamaephyte      | Appetite stimulant (Sb)               |
| 143                       | <sup>f</sup> <i>Tamarindus indica</i> L.             | Chinta            | Tree      | Phanerophyte     | Edible (L, F)                         |
| 144                       | <i>Tephrosia purpurea</i> (L.) Pers.                 | Vempali           | Herb      | Therophyte       | Easy delivery (R), manure (Wh)        |
| 145                       | <i>Teramnus labialis</i> (L.f.) Spreng.              | Adavi minumulu    | Twiner    | Therophyte       | Sexual debility (Wh)                  |
| 146                       | <i>Uraria rufescens</i> (DC.) Schindl.               | -                 | Herb      | Therophyte       | Nerve tonic (L)                       |
| 147                       | <i>Vigna trilobata</i> (L.) Verdc.                   | Pilli pesalu      | Twiner    | Therophyte       | Fodder, manure (Wh)                   |
| 148                       | <i>Xylia xylocarpa</i> (Roxb.) Taub.                 | Bojja             | Tree      | Phanerophyte     | House construction (W)                |
| <b>Polygalaceae (146)</b> |                                                      |                   |           |                  |                                       |
| 149                       | <i>Polygala arvensis</i> Willd.                      | Chitti janumu     | Herb      | Therophyte       | Antibacterial (L)                     |
| 150                       | <i>Polygala chinensis</i> L.                         | Chitti janumu     | Herb      | Therophyte       | Antibacterial (L)                     |
| <b>Rhamnaceae (151)</b>   |                                                      |                   |           |                  |                                       |
| 151                       | <i>Ventilago maderaspatana</i> Gaertn.               | Galivana teega    | Climber   | Therophyte       | Aphrodisiac (Sb)                      |
| 152                       | <i>Ziziphus mauritiana</i> Mill.                     | Regu              | Tree      | Phanerophyte     | Edible (F)                            |
| 153                       | <i>Ziziphus oenopolia</i> (L.) Mill.                 | Pariki            | Straggler | Liana            | Edible (F), dysentery (Sb)            |
| 154                       | <i>Ziziphus rugosa</i> Lam.                          | Enugu pariki      | Straggler | Liana            | Bone fracture (L)                     |
| 155                       | <i>Ziziphus xylopyrus</i> (Retz.) Willd.             | Gotte             | Tree      | Phanerophyte     | Fodder                                |
| <b>Ulmaceae (152)</b>     |                                                      |                   |           |                  |                                       |
| 156                       | <i>Holoptelea integrifolia</i> Planch.               | Nemali nara       | Tree      | Phanerophyte     | Fire wood (Wh)                        |

|                            |                                                                 |                |                    |                  |                                                               |
|----------------------------|-----------------------------------------------------------------|----------------|--------------------|------------------|---------------------------------------------------------------|
| <b>Cannabaceae (153)</b>   |                                                                 |                |                    |                  |                                                               |
| 157                        | <i>Trema orientalis</i> (L.) Blume                              | Kaka mushti    | Tree               | Phanerophyte     | Diarrhoea (R)                                                 |
| <b>Moraceae (154)</b>      |                                                                 |                |                    |                  |                                                               |
| 158                        | <i>Ficus altissima</i> Blume                                    | -              | Tree               | Nanophanerophyte | Wounds healing (La)                                           |
| 159                        | <i>Ficus arnottiana</i> (Miq.)Miq.                              | Kalla ravi     | Tree               | Nanophanerophyte | Fodder                                                        |
| 160                        | <i>Ficus benghalensis</i> L.                                    | Marri          | Tree               | Phanerophyte     | Edible (F), wounds healing (La)                               |
| 161                        | * <i>Ficus hispida</i> L.f.                                     | Bomma medi     | Tree               | Phanerophyte     | Fibre (Sb), meal plates (L)                                   |
| 162                        | <i>Ficus mollis</i> Vahl                                        | Banda juvvi    | Tree               | Phanerophyte     | Wounds healing (Sb)                                           |
| 163                        | <i>Ficus microcarpa</i> L.f.                                    | Juvvi          | Tree               | Nanophanerophyte | Leucoderma (Sb)                                               |
| 164                        | <i>Ficus racemosa</i> L.                                        | Medi           | Tree               | Nanophanerophyte | Bone fracture (L)                                             |
| 165                        | <i>Ficus religiosa</i> L.                                       | Raavi          | Tree               | Phanerophyte     | Worship, source of bird-lime (Wh)                             |
| 166                        | <i>Ficus tinctoria</i> subsp. <i>parasitica</i> (Willd.) Corner | Adavi barrenka | Tree               | Nanophanerophyte | Veterinary (Sb)                                               |
| 167                        | <i>Ficus virens</i> Aiton                                       | Banda juvvi    | Tree               | Phanerophyte     | Rheumatism (Sb)                                               |
| 168                        | <i>Streblus asper</i> Lour.                                     | Barrenka       | Tree               | Nanophanerophyte | Agricultural implements (W), tooth brush (Sh), sand paper (L) |
| <b>Cucurbitaceae (167)</b> |                                                                 |                |                    |                  |                                                               |
| 169                        | <i>Coccinia grandis</i> (L.) Voigt                              | Kakidonda      | Tendrillar climber | Hemicryptophyte  | Jaundice (L)                                                  |
| 170                        | <i>Corallocarpus epigaeus</i> (Rottler) Hook.f.                 | Naga donda     | Tendrillar climber | Hemicryptophyte  | Snake bite (T)                                                |
| 171                        | <i>Ctenolepis garcinii</i> (L.) C.B.Clarke                      | Gargoo         | Tendrillar climber | Hemicryptophyte  | Throat disorders (Wh)                                         |
| 172                        | <i>Diplocyclos palmatus</i> (L.) C.Jeffrey                      | Linga donda    | Tendrillar climber | Hemicryptophyte  | Diarrhoea (F)                                                 |
| 173                        | <i>Momordica charantia</i> L.                                   | Kakara         | Tendrillar climber | Hemicryptophyte  | Edible (F)                                                    |
| 174                        | <i>Momordica dioica</i> Roxb. ex Willd.                         | Boda kakara    | Tendrillar climber | Hemicryptophyte  | Edible (F)                                                    |

|     |                                                                           |                      |                       |                  |                     |
|-----|---------------------------------------------------------------------------|----------------------|-----------------------|------------------|---------------------|
| 175 | <i>Mukia maderaspatana</i> (L.)<br>M.Roem.                                | Noogu dosa           | Tendrillar<br>climber | Hemicryptophyte  | Tooth-ache (R)      |
| 176 | <i>Solena amplexicaulis</i> (Lam.)<br>Gandhi                              | Adavi donda          | Tendrillar<br>climber | Hemicryptophyte  | Spermatorrhoea (R)  |
| 177 | <i>Trichosanthes cucumerina</i> L.<br><b>Celastraceae (172)</b>           | Chedu potla          | Tendrillar<br>climber | Hemicryptophyte  | Dysentery (R)       |
| 178 | <i>Cassine glauca</i> (Rottb.) Kuntze                                     | Bhootankus           | Tree<br>Stem          | Phanerophyte     | Head-ache (L)       |
| 179 | <i>Celastrus paniculatus</i> Willd.                                       | Malleru teega        | climber               | Chamaephyte      | Abortifacient (Sb)  |
| 180 | <i>Gymnosporia emarginata</i> (Willd.)<br>Thwaites                        | Danthi               | Small tree            | Nanophanerophyte | Ulcers (L)          |
|     | <b>Oxalidaceae (175)</b>                                                  |                      |                       |                  |                     |
| 181 | <i>Biophytum sensitivum</i> (L.) DC.                                      | Atti patti           | Herb                  | Therophyte       | Boils, blisters (L) |
|     | <b>Erythroxylaceae (182)</b>                                              |                      |                       |                  |                     |
| 182 | <i>Erythroxylum monogynum</i> Roxb.                                       | Deva daru            | Small tree            | Nanophanerophyte | Diaphoretic (L)     |
|     | <b>Euphorbiaceae (184)</b>                                                |                      |                       |                  |                     |
| 183 | <i>Acalypha ciliata</i> Forssk.                                           | Muripinda            | Herb                  | Therophyte       | Laxative (L)        |
| 184 | <i>Acalypha indica</i> L.                                                 | Muripinda            | Herb                  | Therophyte       | Skin disease (Wh)   |
| 185 | <i>Acalypha lanceolata</i> Willd.                                         | Penta puti           | Herb                  | Therophyte       | Laxative (L)        |
| 186 | <i>Baliospermum solanifolium</i><br>(Burm.) Suresh                        | Danthi<br>Reddivaari | Shrub                 | Therophyte       | Purgative (R)       |
| 187 | <i>Chamaesyce hirta</i> (L.) Millsp.<br>* <i>Chamaesyce indica</i> (Lam.) | nanubalu             | Herb                  | Therophyte       | Bone fracture (La)  |
| 188 | Croizat                                                                   | -                    | Herb                  | Therophyte       | Warts (La)          |
| 189 | * <i>Chamaesyce prostrata</i> Aiton                                       | -                    | Herb                  | Therophyte       | Haemorrhoid (Wh)    |
| 190 | * <i>Chamaesyce serpens</i> (Kunth)<br>Small                              | -                    | Herb                  | Therophyte       | Forage              |

|     |                                                           |                        |            |                  |                                             |
|-----|-----------------------------------------------------------|------------------------|------------|------------------|---------------------------------------------|
| 191 | * <i>Chamaesyce thymifolia</i> (L.)<br>Millsp.            | Reddivaari<br>nanubalu | Herb       | Therophyte       | Laxative (L)                                |
| 192 | <i>Chrysopogon zizanioides</i> (L.)<br>Roberty            | Vattiveru              | Herb       | Hemicryptophyte  | Fodder (S), cooling agent (R)               |
| 193 | <i>Cleistanthus collinus</i> (Roxb.)<br>Benth. ex Hook.f. | Nalla kodisha          | Tree       | Phanerophyte     | Stupify fish (F), timber (W), enclosure (S) |
| 194 | <i>Givotia moluccana</i> (L.) Sreem.                      | Tella poliki           | Tree       | Phanerophyte     | Making toys (W), edible (F)                 |
| 195 | <i>Mallotus philippinensis</i> (Lam.)<br>Muell.-Arg.      | Kunkuma                | Tree       | Phanerophyte     | Fodder, dye (Fr)                            |
| 196 | <i>Microstachys chamaelea</i> (L.)<br>Muell.-Arg.         | Bapana buraku          | Herb       | Therophyte       | Forage, skin disease (R)                    |
| 197 | <i>Tragia involucrata</i> L.                              | Dula gondi             | Twiner     | Therophyte       | Scorpion bite (R)                           |
|     | <b>Ochnaceae (187)</b>                                    |                        |            |                  |                                             |
| 198 | <i>Ochna obtusata</i> DC.                                 | Sonnari, errajenbi     | Small tree | Nanophanerophyte | Veterinary (Sb)                             |
|     | <b>Phyllanthaceae (189)</b>                               |                        |            |                  |                                             |
| 199 | <i>Breynia retusa</i> (Dennst.) Alston                    | Purugudu               | Shrub      | Chamaephyte      | Aphrodisiac (R)                             |
| 200 | <i>Bridelia montana</i> (Roxb.) Willd.                    | Panchotkam             | Tree       | Phanerophyte     | Veterinary (Sb)                             |
| 201 | <i>Bridelia retusa</i> (L.) A.Juss.                       | Korra maddi            | Tree       | Phanerophyte     | Edible (F), veterinary (Sb)                 |
| 202 | <i>Flueggea leucopyrus</i> Willd.                         | Tella pulicheru        | Shrub      | Chamaephyte      | Fish poison (Sb)                            |
| 203 | <i>Glochidion zeylanicum</i> (Gaertn.)<br>A.Juss.         | Neeralli               | Tree       | Nanophanerophyte | Veterinary (Sb)                             |
| 204 | * <i>Phyllanthus amarus</i> Schumach.<br>& Thonn.         | Nela usiri             | Herb       | Therophyte       | Jaundice (Wh)                               |
| 205 | <i>Phyllanthus emblica</i> L.                             | Usiri                  | Tree       | Phanerophyte     | Edible, pickled (F)                         |
| 206 | * <i>Phyllanthus hookeri</i> Muell.-Arg.                  | Yerra usiri            | Herb       | Therophyte       | Jaundice (Wh)                               |
| 207 | <i>Phyllanthus maderaspatensis</i> L.                     | Nela usirika           | Herb       | Therophyte       | Diuretic (S)                                |
| 208 | * <i>Phyllanthus nozeranii</i> Rossignol<br>& Haicour     | Erra usirikee          | Herb       | Therophyte       | Appetizer (L)                               |
| 209 | <i>Phyllanthus reticulatus</i> Poir.                      | Pulicheru              | Stem       | Hemicryptophyte  | Piles, fodder (L)                           |

|     |                                                                         |                          |                       |                  |                                |
|-----|-------------------------------------------------------------------------|--------------------------|-----------------------|------------------|--------------------------------|
|     |                                                                         |                          | climber               |                  |                                |
| 210 | <i>Phyllanthus simplex</i> Retz.                                        | Uchchi usirika           | Herb                  | Therophyte       | Eye troubles (L)               |
| 211 | <i>Sauropus quadrangularis</i> (Willd.)<br>Muell.-Arg.                  | -                        | Herb                  | Therophyte       | Tonsillitis (L)                |
|     | <b>Passifloraceae (199)</b>                                             |                          |                       |                  |                                |
| 212 | * <i>Passiflora foetida</i> L.                                          | Pasi jumiki              | Tendrillar<br>climber | Hemicryptophyte  | Head-ache (L)                  |
|     | <b>Salicaceae (201)</b>                                                 |                          |                       |                  |                                |
| 213 | <i>Casearia nigrescens</i> Tul.                                         | Kanmeswaram              | Tree                  | Phanerophyte     | Fish poison (Sb)               |
| 214 | <i>Flacourtia indica</i> (Burm.f.) Merr.                                | Kanregu                  | Shrub                 | Chamaephyte      | Scorpion bite (L)              |
|     | <b>Violaceae (202)</b>                                                  |                          |                       |                  |                                |
| 215 | <i>Hybanthus enneaspermis</i> (L.)<br>F.Muell.                          | Nela kobbari             | Herb                  | Therophyte       | Aphrodisiac (Wh)               |
|     | <b>Combretaceae (218)</b>                                               |                          |                       |                  |                                |
| 216 | <i>Anogeissus acuminata</i> (Roxb. ex<br>DC.) Wall. ex Guillem. & Perr. | Pachimanu                | Tree                  | Phanerophyte     | Cough (L)                      |
| 217 | <i>Anogeissus latifolia</i> (Roxb. ex<br>DC.) Wall. ex Guillem. & Perr. | Tiruman                  | Tree                  | Phanerophyte     | Timber (W), fodder (L)         |
| 218 | <i>Combretum albidum</i> G.Don                                          | Are teega, Yada<br>teega | Stem<br>climber       | Liana            | Baskets (Sh)                   |
| 219 | <i>Combretum decandrum</i> Jacq.                                        | Yadaku                   | Stem<br>climber       | Liana            | Veterinary (Sb)                |
| 220 | <i>Combretum latifolium</i> Blume                                       | Yada teega               | Stem<br>climber       | Liana            | Veterinary (Sb)                |
| 221 | <i>Gitonia floribunda</i> Roxb.                                         | Bontha                   | Stem<br>climber       | Nanophanerophyte | Baskets (Sh)                   |
| 222 | <i>Terminalia alata</i> Wall.                                           | Nalla maddi              | Tree                  | Megaphanerophyte | Timber (W)                     |
| 223 | <i>Terminalia arjuna</i> (Roxb. ex DC.)<br>Wight & Arn.                 | Tella maddi              | Tree                  | Megaphanerophyte | Timber (W), cardiac tonic (Sb) |
| 224 | <i>Terminalia bellirica</i> (Gaertn.)                                   | Tani                     | Tree                  | Phanerophyte     | Cough (F)                      |

|     |                                                          |                |            |                     |                                     |
|-----|----------------------------------------------------------|----------------|------------|---------------------|-------------------------------------|
|     | Roxb.                                                    |                |            |                     |                                     |
| 225 | <i>Terminalia chebula</i> Retz.                          | Karakkaya      | Tree       | Phanerophyte        | Cough (F)                           |
|     | <b>Lythraceae (219)</b>                                  |                |            |                     |                                     |
| 226 | <i>Lagerstroemia parviflora</i> Roxb.                    | Chennangi      | Tree       | Phanerophyte        | Timber, agricultural implements (W) |
| 227 | <i>Woodfordia floribunda</i> Salisb.                     | Jaaji          | Shrub      | Chamaephyte         | Anti-diarrhoeal (Fl)                |
|     | <b>Onagraceae (220)</b>                                  |                |            |                     |                                     |
| 228 | <i>Ludwigia adscendens</i> (L.) H.Hara                   | Neeti bachali  | Herb       | Therophyte, aquatic | Dysentery (L)                       |
| 229 | <i>Ludwigia hyssopifolia</i> (G.Don)<br>Exell            | Neeti lalangam | Herb       | Therophyte, aquatic | Diarrhoea (L)                       |
|     | <b>Myrtaceae (222)</b>                                   |                |            |                     |                                     |
| 230 | <i>Syzygium cumini</i> (L.) Skeels                       | Jinna          | Tree       | Phanerophyte        | Edible (F)                          |
|     | <b>Melastomataceae (223)</b>                             |                |            |                     |                                     |
| 231 | <i>Melastoma malabathricum</i> L.                        | Nekkarika      | Shrub      | Chamaephyte         | Skin troubles (L, Sb)               |
| 232 | <i>Memecylon edule</i> Roxb.                             | Alli           | Small tree | Nanophanerophyte    | Edible (F), diuretic (R)            |
| 233 | <i>Osbeckia stellata</i> Buch.-Ham. ex<br>Ker Gawl.      | Adavi gulabi   | Herb       | Therophyte          | Abortifacient (R)                   |
|     | <b>Burseraceae (238)</b>                                 |                |            |                     |                                     |
| 234 | <i>Boswellia serrata</i> Roxb. ex<br>Colebr.             | Anduga         | Tree       | Mesophanerophyte    | Gum-resin (Sb)                      |
| 235 | <i>Garuga pinnata</i> Roxb.                              | Garuga         | Tree       | Phanerophyte        | Pickle (F)                          |
|     | <b>Anacardiaceae (239)</b>                               |                |            |                     |                                     |
| 236 | <i>Buchanania axillaris</i> (Desr.)<br>Ramamoorthy       | Pedda morli    | Tree       | Phanerophyte        | Edible (K)                          |
| 237 | <i>Buchanania cochinchinensis</i><br>(Lour.) M.R.Almeida | Morli          | Tree       | Phanerophyte        | Edible (K)                          |
| 238 | <i>Lannea coromandelica</i> (Houtt.)<br>Merr.            | Dumpena        | Tree       | Phanerophyte        | Wounds healing (Sb)                 |
| 239 | <i>Mangifera indica</i> L.                               | Mamidi         | Tree       | Megaphanerophyte    | Edible (F)                          |
| 240 | <i>Semecarpus anacardium</i> L.f.                        | Nalla jeedi    | Tree       | Phanerophyte        | Edible (Ps)                         |

**Sapindaceae (240)**

|     |                                                                 |                       |                            |                 |                     |
|-----|-----------------------------------------------------------------|-----------------------|----------------------------|-----------------|---------------------|
| 241 | <i>*Cardiospermum halicacabum</i> L.<br>var. <i>microcarpum</i> | Chinna budda<br>kashe | Watch<br>spring<br>climber | Hemicryptophyte | Piles (L)           |
| 242 | <i>Dodonaea viscosa</i> (L.) Jacq.                              | Devadaru, Puli veli   | Shrub                      | Chamaephyte     | Walking sticks (W)  |
| 243 | <i>Sapindus emarginatus</i> Vahl                                | Kunkudu               | Tree                       | Phanerophyte    | Natural shampoo (F) |
| 244 | <i>Schleichera oleosa</i> (Lour.) Merr.                         | Pusuku                | Tree                       | Phanerophyte    | Edible (F)          |

**Rutaceae (241)**

|     |                                                   |               |            |                  |                             |
|-----|---------------------------------------------------|---------------|------------|------------------|-----------------------------|
| 245 | <i>Aegle marmelos</i> (L.) Correa                 | Maredu        | Tree       | Phanerophyte     | Edible (F), worship (L)     |
| 246 | <i>Atalantia monophylla</i> DC.                   | Adavi nimma   | Small tree | Nanophanerophyte | Pickle (F)                  |
| 247 | <i>Chloroxylon swietenia</i> DC.                  | Billudu       | Tree       | Phanerophyte     | Agricultural implements (W) |
| 248 | <i>Limonia acidissima</i> Groff                   | Velaga        | Tree       | Phanerophyte     | Edible (Fp), medicinal (L)  |
| 249 | <sup>¥</sup> <i>Murraya koenigii</i> (L.) Spreng. | Karivepa      | Tree       | Nanophanerophyte | Flavouring agent (L)        |
| 250 | <i>Naringi crenulata</i> (Roxb.)<br>Nicolson      | Thorri velaga | Shrub      | Chamaephyte      | Fodder                      |
| 251 | <i>Toddalia asiatica</i> (L.) Lam.                | Konda kasinda | Straggler  | Chamaephyte      | Dog bite (R)                |

**Simaroubaceae**

|     |                                             |            |      |              |                 |
|-----|---------------------------------------------|------------|------|--------------|-----------------|
| 252 | <sup>¥</sup> <i>Ailanthus excelsa</i> Roxb. | Pedda manu | Tree | Phanerophyte | Astringent (Sb) |
|-----|---------------------------------------------|------------|------|--------------|-----------------|

**Meliaceae (243)**

|     |                                          |      |      |              |                                     |
|-----|------------------------------------------|------|------|--------------|-------------------------------------|
| 253 | <i>*Azadirachta indica</i> A.Juss.       | Vepa | Tree | Phanerophyte | Timber, agricultural implements (W) |
| 254 | <i>Soymida febrifuga</i> (Roxb.) A.Juss. | Somi | Tree | Phanerophyte | Timber, agricultural implements (W) |

**Malvaceae (250)**

|     |                                     |                  |       |                  |                          |
|-----|-------------------------------------|------------------|-------|------------------|--------------------------|
| 255 | <i>Abelmoschus moschatus</i> Medik. | Kasturi benda    | Herb  | Therophyte       | Carminative (S)          |
| 256 | <i>Abutilon indicum</i> (L.) Sweet  | Thuthuru benda   | Shrub | Therophyte       | Tooth brush (Br)         |
| 257 | <i>Bombax ceiba</i> L.              | Booruga          | Tree  | Mesophanerophyte | Soft, making plywood (W) |
| 258 | <i>Byttneria herbacea</i> Roxb.     | Erra katla teega | Herb  | Therophyte       | Swellings (R)            |
| 259 | <i>Corchorus capsularis</i> L.      | Janapa nara      | Herb  | Therophyte       | Fibre (Sb)               |

|     |                                               |                    |            |                  |                               |
|-----|-----------------------------------------------|--------------------|------------|------------------|-------------------------------|
| 260 | <i>Corchorus fascicularis</i> Lam.            | Janapa             | Herb       | Therophyte       | Astringent (Wh)               |
| 261 | <i>Corchorus oltorius</i> L.                  | Janapa nara        | Herb       | Therophyte       | Fibre (Sb)                    |
| 262 | <i>Eriolaena hookeriana</i> Wight & Arn.      | Bothuku            | Tree       | Phanerophyte     | Veterinary, fibre (Sb)        |
| 263 | <i>Firmiana simplex</i> (L.) W.Wight          | Tabasi             | Tree       | Phanerophyte     | Gum (Sb)                      |
| 264 | <i>Grewia damine</i> Gaertn.                  | Adavi jana         | Shrub      | Chamaephyte      | Laxative (F)                  |
| 265 | <i>Grewia hirsuta</i> Vahl                    | Jibilika           | Shrub      | Chamaephyte      | Laxative (F)                  |
| 266 | <i>Grewia multiflora</i> Juss.                | Potirika           | Shrub      | Chamaephyte      | Fodder (L)                    |
| 267 | <i>Grewia rothii</i> DC.                      | Channa jana        | Shrub      | Chamaephyte      | Laxative (F)                  |
| 268 | <i>Grewia tiliifolia</i> Vahl                 | Tada               | Small tree | Nanophanerophyte | Fibre (Sb)                    |
| 269 | <i>Grewia villosa</i> Willd.                  | Banta, chenulu     | Shrub      | Chamaephyte      | Edible (F)                    |
| 270 | <i>Helicteres isora</i> L.                    | Nulthada           | Shrub      | Chamaephyte      | Fibre (Sb)                    |
| 271 | <i>Hibiscus panduriformis</i> Burm.f.         | Adavi benda        | Shrub      | Chamaephyte      | Skin disease (R)              |
| 272 | <i>Hibiscus vitifolius</i> L.                 | Adavi patti        | Herb       | Therophyte       | Fibre (Sb)                    |
| 273 | <i>Kydia calycina</i> Roxb.                   | Konda patti        | Tree       | Phanerophyte     | Dyspepsia (Sb)                |
| 274 | <i>Melochia corchorifolia</i> L.              | Bankodi            | Herb       | Therophyte       | Fibre (Sb)                    |
| 275 | <i>Pavonia odorata</i> Willd.                 | Chitti benda       | Herb       | Therophyte       | Stomach pain (R)              |
| 276 | <i>Pavonia zeylanica</i> (L.) Cav.            | Chinna mudda benda | Herb       | Therophyte       | Anthelmintic (Wh)             |
| 277 | <i>Pterospermum xylocarpum</i> (Gaertn.) Oken | Lolugu             | Tree       | Phanerophyte     | Meal plate (L), furniture (W) |
| 278 | * <i>Sida acuta</i> Burm.f.                   | Chiluka parre      | Herb       | Therophyte       | Broom, mental disorders (R)   |
| 279 | <i>Sida cordata</i> (Burm.f.) Borss.Waalk.    | Gayapaku           | Herb       | Therophyte       | Tonic (R)                     |
| 280 | <i>Sida cordifolia</i> L.                     | Chiru benda        | Herb       | Therophyte       | Appetite stimulant (R)        |
| 281 | <i>Sida spinosa</i> L.                        | Naga bala          | Herb       | Therophyte       | Fever (R)                     |
| 282 | <i>Thespesia lampas</i> (Cav.) Dalzell        | Adavi patti        | Herb       | Therophyte       | Fibre (S), diuretic (R)       |
| 283 | <i>Triumfetta rhomboidea</i> Jacq.            | Marla benda        | Herb       | Therophyte       | Galactagogue (R)              |



|                             |                                                 |                                 |         |                 |                                      |
|-----------------------------|-------------------------------------------------|---------------------------------|---------|-----------------|--------------------------------------|
| 284                         | <i>Urena lobata</i> L.                          | Pedda benda                     | Herb    | Therophyte      | Skin disease (R)                     |
| 285                         | <i>Waltheria indica</i> L.                      | Dubba dulicheru,<br>Nalla benda | Herb    | Therophyte      | Insect bite (L)                      |
| <b>Bixaceae (253)</b>       |                                                 |                                 |         |                 |                                      |
| 286                         | <i>Cochlospermum religiosum</i> (L.)<br>Alston  | Konda gogu                      | Tree    | Phanerophyte    | Gum (Sb)                             |
| <b>Moringaceae (259)</b>    |                                                 |                                 |         |                 |                                      |
| 287                         | <i>Moringa concanensis</i> Nimmo                | Adavi munaga                    | Tree    | Phanerophyte    | Abortifacient (Sb)                   |
| 288                         | # <i>Moringa pterygosperma</i> Gaertn.          | Munaga                          | Tree    | Phanerophyte    | Aphrodisiac (Sb), Edible (L, F)      |
| <b>Capparaceae (271)</b>    |                                                 |                                 |         |                 |                                      |
| 289                         | <i>Cadaba fruticosa</i> (L.) Druce              | Adamorinika                     | Climber | Hemicryptophyte | Anthelmintic (R, L)                  |
| 290                         | <i>Capparis sepiaria</i> L.                     | Nalla uppi                      | Climber | Hemicryptophyte | Laxative (Fl)                        |
| 291                         | <i>Capparis zeylanica</i> L.                    | Aadonda                         | Climber | Hemicryptophyte | Vegetable, edible (F), dyspepsia (R) |
| <b>Cleomaceae (272)</b>     |                                                 |                                 |         |                 |                                      |
| 292                         | <i>Cleome aspera</i> J.Koenig ex DC.            | Mulu vaminta                    | Herb    | Therophyte      | Cuts (L)                             |
| 293                         | * <i>Cleome felina</i> L.f.                     | Gulabi vaminta                  | Herb    | Therophyte      | Vermifuge (L)                        |
| 294                         | * <i>Cleome gynandra</i> L.                     | Vaminta                         | Herb    | Therophyte      | Head-ache (L)                        |
| 295                         | <i>Cleome monophylla</i> L.                     | Gaddi vaminta                   | Herb    | Therophyte      | Insect bite (L)                      |
| 296                         | <i>Cleome viscosa</i> L.                        | Kukka vaminta                   | Herb    | Therophyte      | Skin disease (Wh)                    |
| <b>Olacaceae (277)</b>      |                                                 |                                 |         |                 |                                      |
| 297                         | <i>Olax scandens</i> Roxb.                      | Muriki malle, turka<br>thoppe   | Tree    | Phanerophyte    | Edible (F)                           |
| <b>Santalaceae (279)</b>    |                                                 |                                 |         |                 |                                      |
| 298                         | <i>Viscum cruciatum</i> Sieber ex Boiss         | Badanika                        | Herb    | Epiphyte        | Cuts (L)                             |
| <b>Loranthaceae (280)</b>   |                                                 |                                 |         |                 |                                      |
| 299                         | <i>Dendrophthoe falcata</i> (L.f.)<br>Ettingsh. | Vadanica                        | Herb    | Epiphyte        | Fever (Wh)                           |
| <b>Plumbaginaceae (285)</b> |                                                 |                                 |         |                 |                                      |

|     |                                                                           |                     |      |                 |                                                                    |
|-----|---------------------------------------------------------------------------|---------------------|------|-----------------|--------------------------------------------------------------------|
| 300 | <i>Plumbago zeylanica</i> L.                                              | Chitramulam         | Herb | Hemicryptophyte | Boils, blisters, abortion (R)                                      |
|     | <b>Caryophyllaceae (296)</b>                                              |                     |      |                 |                                                                    |
| 301 | <i>Polycarpaea corymbosa</i> (L.) Lam.                                    | Gaddi puvvu         | Herb | Therophyte      | Snake bite (R)                                                     |
|     | <b>Amaranthaceae (298)</b>                                                |                     |      |                 |                                                                    |
| 302 | <i>Achyranthes aspera</i> L.                                              | Uttareni            | Herb | Therophyte      | Tooth brush (R)                                                    |
| 303 | <i>Aerva lanata</i> (L.) Juss.                                            | Pindi kura          | Herb | Therophyte      | Vegetable for kidney stones, wounds (L)                            |
| 304 | <i>Aerva sanguinolenta</i> (L.) Blume                                     | Konda pindi         | Herb | Therophyte      | Vegetable (L)                                                      |
| 305 | <i>Allmania nodiflora</i> (L.) R.Br. ex<br>Wight                          | Gurugu kura         | Herb | Therophyte      | Cold (L)                                                           |
| 306 | * <i>Alternanthera ficoidea</i> (L.) Sm.                                  | Chiluka aku         | Herb | Therophyte      | Soil binder (Wh)                                                   |
| 307 | <i>Alternanthera sessilis</i> (L.) R.Br.<br>ex DC.                        | Ponnaganti          | Herb | Therophyte      | Vegetable (L)                                                      |
| 308 | * <i>Amaranthus spinosus</i> L.                                           | Mulla thotakura     | Herb | Therophyte      | Appetite stimulant (L)                                             |
| 309 | * <i>Amaranthus viridis</i> L.                                            | Chiluka thotakura   | Herb | Therophyte      | Vegetable (L)                                                      |
| 310 | <i>Ammannia baccifera</i> L.                                              | Agni vednapaku      | Herb | Therophyte      | Skin disease (L)<br>Vegetable (L), worship during<br>Batukamma (I) |
| 311 | * <i>Celosia argentea</i> L.                                              | Gunugu              | Herb | Therophyte      | Vegetable (L), forage                                              |
| 312 | <i>Digera muricata</i> (L.) Mart.                                         | Chenchali kura      | Herb | Therophyte      | Cough (R)                                                          |
| 313 | * <i>Gomphrena celosioides</i> Mart.                                      | Tella pagada banthi | Herb | Therophyte      |                                                                    |
| 314 | <i>Pupalia lappacea</i> (L.) Juss. var.<br><i>lappacea</i>                | Gundu uttareni      | Herb | Therophyte      | Insect bite (L)                                                    |
| 315 | <i>Pupalia lappacea</i> (L.) Juss. var.<br><i>velutina</i> (Moq.) Hook.f. | Yerra uttareni      | Herb | Therophyte      | Wounds (L)                                                         |
| 316 | <i>Trichuriella monsoniae</i> (L.f.)<br>Bennet                            | Yerra pindi         | Herb | Therophyte      | Sand binder, purgative (Wh)                                        |
|     | <b>Gisekiaceae (303)</b>                                                  |                     |      |                 |                                                                    |
| 317 | <i>Gisekia pharnaceoides</i> L.                                           | Iska rasi           | Herb | Therophyte      | Pains, vegetable (Wh)                                              |
|     | <b>Nyctaginaceae (307)</b>                                                |                     |      |                 |                                                                    |
| 318 | <i>Boerhavia diffusa</i> L.                                               | Atika mamidi        | Herb | Therophyte      | Fever (Wh)                                                         |

|                            |                                                                    |                              |      |                  |                                               |
|----------------------------|--------------------------------------------------------------------|------------------------------|------|------------------|-----------------------------------------------|
| 319                        | <i>*Boerhavia erecta</i> L.                                        | Punarnava                    | Herb | Therophyte       | Tonic (Wh)                                    |
| <b>Molluginaceae (308)</b> |                                                                    |                              |      |                  |                                               |
| 320                        | <i>Glinus lotoides</i> L.                                          | Chatarasi kura               | Herb | Therophyte       | Abdominal disorders (Wh)                      |
| 321                        | <i>Glinus oppositifolius</i> (L.) A.DC.                            | Santrasi                     | Herb | Therophyte       | Stomach pain (L)                              |
| 322                        | <i>Mollugo pentaphylla</i> L.                                      | Verri chatarasi              | Herb | Therophyte       | Stomach pain (L)                              |
| 323                        | <i>Mollugo nudicaulis</i> Lam.                                     | Parpatakam                   | Herb | Therophyte       | Boils (L)                                     |
| <b>Portulacaceae (314)</b> |                                                                    |                              |      |                  |                                               |
| 324                        | <sup>1</sup> <i>Portulaca oleracea</i> L.                          | Gangavailaku<br>Chinna gaddi | Herb | Therophyte       | Cultivar, vegetable (L)                       |
| 325                        | <sup>#</sup> <i>Portulaca pilosa</i> L.                            | gulabi                       | Herb | Therophyte       | Ornamental (Wh)                               |
| 326                        | <i>Portulaca quadrifida</i> L.                                     | Payalaku                     | Herb | Therophyte       | Vegetable (L)                                 |
| <b>Cornaceae (320)</b>     |                                                                    |                              |      |                  |                                               |
| 327                        | <i>Alangium salviifolium</i> (L.f.)<br>Wangerin                    | Uduga                        | Tree | Phanerophyte     | Purgative (Sb)                                |
| <b>Lecythidaceae (328)</b> |                                                                    |                              |      |                  |                                               |
| 328                        | <i>Barringtonia acutangula</i> (L.)<br>Gaertn.                     | Neeroddi<br>Buda dhermi,     | Tree | Phanerophyte     | Furniture (W), stupifying fish (Sb)           |
| 329                        | <i>Careya arborea</i> Roxb.                                        | dudippa                      | Tree | Phanerophyte     | Agricultural implements (W)                   |
| <b>Sapotaceae (331)</b>    |                                                                    |                              |      |                  |                                               |
| 330                        | <i>Madhuca longifolia</i> var. <i>latifolia</i><br>(Roxb.) A.Chev. | Ippa                         | Tree | Megaphanerophyte | Edible (C), distillation spirit (Fl), oil (S) |
| 331                        | <i>Manilkara hexandra</i> (Roxb.)<br>Dubard                        | Pala                         | Tree | Phanerophyte     | Edible (F), religious functions (Sh)          |
| <b>Ebenaceae (332)</b>     |                                                                    |                              |      |                  |                                               |
| 332                        | <i>Diospyros chloroxylon</i> Roxb.                                 | Illinda                      | Tree | Phanerophyte     | Edible (F), Fuel (W)                          |
| 333                        | <i>Diospyros malabarica</i> (Desr.)<br>Kosterl.                    | Konda tuniki                 | Tree | Phanerophyte     | Fuel (W)                                      |
| 334                        | <i>Diospyros melanoxylon</i> Roxb.                                 | Tuniki                       | Tree | Phanerophyte     | Beedi making (L), edible (F)                  |

|     |                                                          |                              |            |                  |                             |
|-----|----------------------------------------------------------|------------------------------|------------|------------------|-----------------------------|
| 335 | <i>Diospyros montana</i> Roxb.                           | Muchi tuniki                 | Tree       | Phanerophyte     | Inorexia (Sb)               |
|     | <b>Rubiaceae (350)</b>                                   |                              |            |                  |                             |
| 336 | <i>Benkara malabarica</i> (Lam.)<br>Tirveng.             | Peddalli                     | Small tree | Nanophanerophyte | Animal feed (F)             |
| 337 | <i>Catunaregam spinosa</i> (Thunb.)<br>Tirveng.          | Manga                        | Small tree | Nanophanerophyte | Fish poison (F)             |
| 338 | <i>Ceriscoides turgida</i> (Roxb.)<br>Tirveng.           | Kukka elka                   | Tree       | Phanerophyte     | Cough (Sb)                  |
| 339 | <i>Gardenia gummifera</i> L.f.                           | Bikki                        | Small tree | Nanophanerophyte | Edible (F)                  |
| 340 | <i>Gardenia latifolia</i> Aiton                          | Pedda bikki                  | Tree       | Phanerophyte     | Edible (F)                  |
| 341 | <i>Gardenia resinifera</i> Roth                          | Chinna bikki,<br>karinga     | Small tree | Nanophanerophyte | Gum-resin (Lb)              |
| 342 | <i>Haldina cordifolia</i> (Roxb.)<br>Ridsdale            | Bandaru                      | Tree       | Mesophanerophyte | Agricultural implements (W) |
| 343 | <i>Ixora pavetta</i> Andr.                               | Korivi                       | Shrub      | Chamaephyte      | Fodder, fencing (Wh)        |
| 344 | <i>Mitragyna parviflora</i> (Roxb.)<br>Korth.            | Batta kanapa                 | Tree       | Mesophanerophyte | Furniture (W)               |
| 345 | <i>Morinda pubescens</i> Sm.                             | Togara                       | Tree       | Phanerophyte     | Yellow die (R)              |
| 346 | <i>Oldenlandia affinis</i> (Roem. &<br>Schult.) DC.      |                              | Herb       | Therophyte       | Forage                      |
| 347 | <i>Oldenlandia umbellata</i> L.                          | Chiruveru<br>Savirela, Surya | Herb       | Therophyte       | Bronchial asthma (Wh)       |
| 348 | <i>Paederia foetida</i> L.                               | bhakta                       | Twiner     | Hemicryptophyte  | Antidiarrhoeal (L)          |
| 349 | <i>Spermacoce articularis</i> L.f.                       | Madanaku                     | Herb       | Therophyte       | Forage                      |
| 350 | <i>Tamilnadia uliginosa</i> (Retz.)<br>Tirveng. & Sastre | Guvvenka                     | Shrub      | Nanophanerophyte | Veterinary (Sb)             |
| 351 | <i>Tarenna asiatica</i> (L.) Kuntze ex<br>K.Schum.       | Komi                         | Shrub      | Chamaephyte      | Vermicide (F)               |
|     | <b>Gentianaceae (351)</b>                                |                              |            |                  |                             |
| 352 | <i>Canscora alata</i> (Roth) Wall.                       | Shanku                       | Herb       | Therophyte       | Mental disorders (Wh)       |

|                          |                                                         |                          |              |                 |                                                      |
|--------------------------|---------------------------------------------------------|--------------------------|--------------|-----------------|------------------------------------------------------|
| 353                      | <i>Canscora diffusa</i> (Vahl) R.Br. ex Roem. & Schult. | Shanku                   | Herb         | Therophyte      | Mental disorders (Wh)                                |
| 354                      | <i>Enicostemma axillare</i> (Lam.) A.Raynal.            | Resca                    | Herb         | Therophyte      | Antidiabetic (Wh)                                    |
| <b>Loganiaceae (352)</b> |                                                         |                          |              |                 |                                                      |
| 355                      | <i>Strychnos nux-vomica</i> L.                          | Visha mushti             | Tree         | Phanerophyte    | Agricultural implements (W), stupifying fish (Sb, F) |
| 356                      | <i>Strychnos potatorum</i> L.f.                         | Chilla                   | Tree         | Phanerophyte    | Water purification (S), Agricultural implements (W)  |
| <b>Apocynaceae (354)</b> |                                                         |                          |              |                 |                                                      |
| 357                      | <i>Anodendron paniculatum</i> A.DC.                     | Athukudu teega           | Stem climber | Liana           | Bone fracture (Wh)                                   |
| 358                      | * <i>Calotropis gigantea</i> (L.) Dryand.               | Jilledu                  | Shrub        | Chamaephyte     | Rheumatism (La), snake bite (R)                      |
| 359                      | <i>Cryptolepis dubia</i> (Burm.f.) M.R.Almeida          | Budda pala               | Twiner       | Hemicryptophyte | Galactogogue (R)                                     |
| 360                      | <i>Dregea volubilis</i> (L.f.) Benth. ex Hook.f.        | Bandi gurija             | Twiner       | Hemicryptophyte | Rheumatism (L)                                       |
| 361                      | <i>Gymnema sylvestre</i> (Retz.) R.Br. ex Sm.           | Poda patri               | Twiner       | Hemicryptophyte | Anti-diabetic (L)                                    |
| 362                      | <i>Hemidesmus indicus</i> (L.) R.Br. ex Schult.         | Sugandhi pala            | Twiner       | Hemicryptophyte | Anti-diarrheal (R)                                   |
| 363                      | <i>Hemidesmus indicus</i> var. <i>pubescens</i> Hook.f. | Barre sugandhi pala      | Twiner       | Hemicryptophyte | Galactogogue (Wh)                                    |
| 364                      | <i>Holarrhena pubescens</i> Wall. ex G.Don              | Pala kodisha             | Tree         | Phanerophyte    | Carving toys (W), dysentery (Sb)                     |
| 365                      | <i>Ichnocarpus frutescens</i> (L.) W.T.Aiton            | Nalla teega              | Twiner       | Hemicryptophyte | Diabetes (R)                                         |
| 366                      | <i>Oxystelma esculentum</i> (L.f.) Sm.                  | Dudi pala, chandra valli | Twiner       | Hemicryptophyte | Galactogogue (Wh)                                    |

|                             |                                                       |                                    |         |                 |                                    |
|-----------------------------|-------------------------------------------------------|------------------------------------|---------|-----------------|------------------------------------|
| 367                         | <i>Pergularia daemia</i> (Forssk.)<br>Chiov.          | Dushtapu teega                     | Twiner  | Hemicryptophyte | Respiratory disease (Wh)           |
| 368                         | <i>Marsdenia tenacissima</i> (Roxb.)<br>Moon          | Karu dushtapu<br>teega, jaka teega | Twiner  | Hemicryptophyte | Fibre (S), tumors, wounds (R)      |
| 369                         | <i>Tylophora indica</i> (Burm.f.) Merr.               | Mekameyani aku                     | Twiner  | Hemicryptophyte | Asthma (L)                         |
| 370                         | <i>Wrightia arborea</i> (Dennst.) Mabb.               | Pala                               | Tree    | Phanerophyte    | Carving toys (W)                   |
| 371                         | <i>Wrightia tinctoria</i> R.Br.                       | Pala                               | Tree    | Phanerophyte    | Carpentary (W)                     |
| <b>Boraginaceae (356)</b>   |                                                       |                                    |         |                 |                                    |
| 372                         | <i>Coldenia procumbens</i> L.                         | Cheppu thattaku                    | Herb    | Therophyte      | Wounds (Wh)                        |
| 373                         | <i>Cordia dichotoma</i> F.Forst.                      | Iriki                              | Tree    | Phanerophyte    | Edible, pickle (F)                 |
| 374                         | <i>Cordia macleodii</i> Hook.f. &<br>Thomson          | Nakkera                            | Tree    | Phanerophyte    | Edible (F), meal plates (L)        |
| 375                         | <i>Ehretia laevis</i> Roxb.                           | Pala danthi                        | Tree    | Phanerophyte    | Dyspepsia (F)                      |
| 376                         | <i>Heliotropium supinum</i> L.                        | -                                  | Herb    | Therophyte      | Stomach-ache (S)                   |
| 377                         | <i>Heliotropium indicum</i> L.                        | Naga danthi                        | Herb    | Therophyte      | Dog bite (L)                       |
| 378                         | <i>Trichodesma indicum</i> (L.) Lehm.                 | Nela nakshatralu,<br>gabba         | Herb    | Therophyte      | Wounds (L)                         |
| <b>Convolvulaceae (357)</b> |                                                       |                                    |         |                 |                                    |
| 379                         | * <i>Cuscuta chinensis</i> Lam.                       | Pashi teega                        | Twiner  | Parasite (S)    | Galactagogue (Wh)                  |
| 380                         | <i>Evolvulus alsinoides</i> (L.) L.                   | Vishnukrantham                     | Herb    | Therophyte      | Fever (L)                          |
| 381                         | * <i>Evolvulus nummularius</i> (L.) L.                | -                                  | Herb    | Therophyte      | Wounds (L)                         |
| 382                         | <i>Ipomoea aquatica</i> Forssk.                       | Thuti kada<br>Lotta peesu,         | Creeper | Therophyte      | Vegetable (L)                      |
| 383                         | * <i>Ipomoea carnea</i> Jacq.                         | l[r]abbar chettu                   | Shrub   | Chamaephyte     | Poisonous (L), tree enclosure (Wh) |
| 384                         | <i>Ipomoea optica</i> (L.) Roth ex<br>Roem. & Schult. | Suvarchala                         | Twiner  | Hemicryptophyte | Mouth wash (L)                     |
| 385                         | <i>Ipomoea eriocarpa</i> R.Br.                        | Elika chevi                        | Twiner  | Hemicryptophyte | Stomach pain (R)                   |
| 386                         | <i>Ipomoea hederifolia</i> L.                         | Kashiratnam                        | Twiner  | Hemicryptophyte | Tonic (R)                          |

|                             |                                                 |                            |         |                  |                                   |
|-----------------------------|-------------------------------------------------|----------------------------|---------|------------------|-----------------------------------|
| 387                         | <i>Ipomoea nil</i> (L.) Roth                    | Kolli vittulu, katla teega | Twiner  | Hemicryptophyte  | Ulcers (Wh)                       |
| 388                         | <i>Ipomoea obscura</i> (L.) Ker Gawl.           | Golla jiddaku              | Twiner  | Hemicryptophyte  | Insect bite (L)                   |
| 389                         | <i>Ipomoea pes-tigridis</i> L.                  | Puli adugu teega           | Twiner  | Hemicryptophyte  | Fodder (Wh)                       |
| 390                         | <i>Merremia hederacea</i> (Burm.f.) Hallier f.  | Talantu teega              | Twiner  | Hemicryptophyte  | Powder as shampoo (F)             |
| 391                         | <i>Merremia repens</i> D.F.Austin & Staples     | Eluka chevi                | Creeper | Hemicryptophyte  | Forage                            |
| 392                         | <i>Merremia tridentata</i> (L.) Hallier f.      | Sitha savaram              | Creeper | Hemicryptophyte  | Rheumatism (Wh)                   |
| 393                         | <i>Operculina turpethum</i> (L.) Silva Manso    | Tagada                     | Twiner  | Hemicryptophyte  | Purgative (Wh)                    |
| 394                         | <i>Rivea hypocrateriformis</i> Choisy           | Boddi kura                 | Twiner  | Hemicryptophyte  | Snake bite (R), vegetable (L)     |
| <b>Solanaceae (358)</b>     |                                                 |                            |         |                  |                                   |
| 395                         | * <i>Physalis angulata</i> L.                   | Budda kashi                | Herb    | Therophyte       | Antipyretic (Wh)                  |
| 396                         | * <i>Solanum virginianum</i> L.                 | Nela mulaka                | Herb    | Therophyte       | Laxative, asthma (F)              |
| <b>Hydroleaceae (361)</b>   |                                                 |                            |         |                  |                                   |
| 397                         | <i>Hydrolea zeylanica</i> (L.) Vahl             | Langali                    | Herb    | Therophyte       | Antiseptic (L)                    |
| <b>Oleaceae (364)</b>       |                                                 |                            |         |                  |                                   |
| 398                         | <i>Nyctanthes arbor-tristis</i> L.              | Karise, parijatha          | Tree    | Nanophanerophyte | Bone fracture (Sb), arthritis (L) |
| 399                         | <i>Schrebera swietenoides</i> Roxb.             | Mokkam                     | Tree    | Phanerophyte     | Fuel (W)                          |
| <b>Plantaginaceae (368)</b> |                                                 |                            |         |                  |                                   |
| 400                         | <i>Bacopa monnieri</i> (L.) Wettst.             | Brahmi                     | Herb    | Therophyte       | Brain tonic (Wh)                  |
| 401                         | <i>Limnophila indica</i> (L.) Druce             | Ambuja                     | Herb    | Therophyte       | Anti-septic (L), forage           |
| 402                         | * <i>Scoparia dulcis</i> L.                     | Goda tulasi                | Herb    | Therophyte       | Menstrual pains (Wh)              |
| 403                         | <i>Striga angustifolia</i> (D.Don) C.J.Saldanha | Jonna malli                | Herb    | Parasite (R)     | Appetite (Wh)                     |
| <b>Linderniaceae (371)</b>  |                                                 |                            |         |                  |                                   |
| 404                         | <i>Lindernia ciliata</i> (Colsm.) Pennell       | Nela rampi                 | Herb    | Therophyte       | Skin disease (Wh)                 |

|                          |                                                           |                                           |                    |                  |                         |
|--------------------------|-----------------------------------------------------------|-------------------------------------------|--------------------|------------------|-------------------------|
| <b>Lamiaceae (373)</b>   |                                                           |                                           |                    |                  |                         |
| 405                      | <i>Anisomeles indica</i> (L.) Kuntze                      | Magabeera                                 | Herb               | Therophyte       | Anstringent (Wh)        |
| 406                      | <i>Anisomeles malabarica</i> (L.) R.Br.<br>ex Sims        | Dayyam chettu                             | Herb               | Therophyte       | Fever (Wh)              |
| 407                      | * <i>Hyptis suaveolens</i> (L.) Poit.                     | Mahabeera                                 | Herb               | Therophyte       | Repellant (Wh)          |
| 408                      | * <i>Leonotis nepetifolia</i> (L.) R.Br.                  | Ranabheri                                 | Herb               | Therophyte       | Rheumatism (L)          |
| 409                      | <i>Leucas aspera</i> (Willd.) Link                        | Thummi                                    | Herb               | Therophyte       | Wounds (L)              |
| 410                      | <i>Leucas biflora</i> (Vahl) Sm.                          | Jodi thummi                               | Herb               | Therophyte       | Antipyretic (Wh)        |
| 411                      | <i>Leucas cephalotes</i> (Roth) Spreng.                   | Pedda thummi                              | Herb               | Therophyte       | Diaphoretic (Wh)        |
| 412                      | <i>Leucas decemdentata</i> (Willd.) Sm.                   | Konda thummi                              | Herb               | Therophyte       | Skin disease (L)        |
| 413                      | * <i>Ocimum americanum</i> L.                             | Kukka tulasi                              | Herb               | Therophyte       | Anti-septic (L)         |
| 414                      | * <i>Ocimum tenuiflorum</i> L.                            | Tulasi                                    | Herb               | Therophyte       | Fever (L), worship (Wh) |
| 415                      | <i>Plectranthus mollis</i> (Aiton)<br>Spreng.             | Nela marri                                | Herb               | Tuber geophyte   | Scorpion bite (R)       |
| 416                      | <i>Premna mollissima</i> Roth                             | Chakori                                   | Tree               | Nanophanerophyte | Ring worm (Sb)          |
| 417                      | <i>Rothea serrata</i> (L.) Steane &<br>Mabb.              | Gantu barangi                             | Herb               | Therophyte       | Skin disease (Wh)       |
| 418                      | <i>Symphorema involucratum</i> Roxb.                      | Konda thakkali                            | Ascending<br>shrub | Hemicryptophyte  | Nerve tonic (L)         |
| <b>Acanthaceae (378)</b> |                                                           |                                           |                    |                  |                         |
| 419                      | * <i>Acmella paniculata</i> (Wall. ex<br>DC.) R.K.Jansen  | Chinna akkala karra                       | Herb               | Therophyte       | Tooth-ache (Fl)         |
| 420                      | <i>Andrographis paniculata</i><br>(Burm.f.) Wall. ex Nees | Nela vemu                                 | Herb               | Therophyte       | Dyspepsia, fever (Wh)   |
| 421                      | <i>Barleria montana</i> Nees                              | Adavi dishambaralu<br>Vajra danthi, Mulla | Herb               | Therophyte       | Skin disease (L)        |
| 422                      | <i>Barleria prionitis</i> L.                              | gorinta                                   | Herb               | Therophyte       | Scorpion bite (R)       |
| 423                      | <i>Blepharis maderaspatensis</i> (L.) B.<br>Heyne ex Roth | Nela pariki                               | Climber            | Therophyte       | Sun stroke (R)          |



|     |                                                      |                          |      |            |                            |
|-----|------------------------------------------------------|--------------------------|------|------------|----------------------------|
| 424 | <i>Dicliptera paniculata</i> (Forssk.)<br>I.Darbysh. | Chebura                  | Herb | Therophyte | Skin disease (L)           |
| 425 | <i>Elytraria acaulis</i> (L.f.) Lindau               | Eddu adugu mokka         | Herb | Therophyte | Tonic (R)                  |
| 426 | * <i>Hemigraphis latebrosa</i> (Roth)<br>Nees        | Akkala chettu            | Herb | Therophyte | Anti-alcoholic agent (Wh)  |
| 427 | <i>Hygrophila auriculata</i><br>(Schumach.) Heine    | Neeti gobbi,<br>golimidi | Herb | Therophyte | Oedema (L), aphodisiac (S) |
| 428 | <i>Indoneesiella echioides</i> (L.)<br>Sreem.        | Goda tulasi              | Herb | Therophyte | Itches (L)                 |
| 429 | <i>Justicia betonica</i> L.                          | Thella kantu             | Herb | Therophyte | Mental disorders (Wh)      |
| 430 | <i>Justicia glauca</i> Rottler                       | Kommu kura               | Herb | Therophyte | Back-ache (L)              |
| 431 | <i>Justicia procumbens</i> L.                        | -                        | Herb | Therophyte | Laxative (L), forage       |
| 432 | <i>Lepidagathis cristata</i> Willd.                  | Nakka peetiri gadda      | Herb | Therophyte | Fever (R)                  |
| 433 | <i>Ruellia patula</i> Jacq.                          | -                        | Herb | Therophyte | Gonorrhea (L)              |

### **Bignoniaceae (379)**

|     |                                                            |                     |      |                  |                               |
|-----|------------------------------------------------------------|---------------------|------|------------------|-------------------------------|
| 434 | <i>Dolichandrone falcata</i> (Wall. ex<br>DC.) Seem.       | Voddi, chitti voddi | Tree | Phanerophyte     | Stupifying fish (Sb)          |
| 435 | * <i>Millingtonia hortensis</i> L.f.                       | Boddu malle         | Tree | Phanerophyte     | Bronchitis (Sb), worship (Fl) |
| 436 | <i>Oroxylum indicum</i> (L.) Kurz                          | Dundilam            | Tree | Nanophanerophyte | Purgative (S)                 |
| 437 | <i>Radermachera xylocarpa</i> (Roxb.)<br>Roxb. ex K.Schum. | -                   | Tree | Phanerophyte     | Edible (F)                    |
| 438 | <i>Stereospermum chelonoides</i> (L.f.)<br>DC.             | Kalagoru            | Tree | Phanerophyte     | Fodder (L)                    |

**Verbenaceae (382)**

|     |                                                  |               |      |              |                                          |
|-----|--------------------------------------------------|---------------|------|--------------|------------------------------------------|
| 439 | <i>Gmelina arborea</i> Roxb.                     | Gummedi tekku | Tree | Phanerophyte | Agricultural implements (W)              |
| 440 | * <i>Lippia javanica</i> (Burm.f.)<br>Spreng.    | Nimma poda    | Herb | Therophyte   | Repellant (Wh)                           |
| 441 | * <i>Stachytarpheta jamaicensis</i> (L.)<br>Vahl | Eduru uttaren | Herb | Therophyte   | Cooling tonic, asthma (L)                |
| 442 | <i>Tectona grandis</i> L.f.                      | Teku          | Tree | Phanerophyte | Furniture, construction (W), worship (I) |

**Asteraceae (400)**

|     |                                                        |                           |       |             |                                 |
|-----|--------------------------------------------------------|---------------------------|-------|-------------|---------------------------------|
| 443 | <i>Adenostemma lavenia</i> (L.) Kuntze                 | Adavi jilakara<br>chettu  | Herb  | Therophyte  | Wound healing (Wh)              |
| 444 | * <i>Ageratum conyzoides</i> (L.) L.                   | Gabbu chettu              | Herb  | Therophyte  | Rheumatism (Wh)                 |
| 445 | * <i>Blumea axillaris</i> (Lam.) DC.                   | Kukka pogaku              | Herb  | Therophyte  | Cuts (L)                        |
| 446 | * <i>Blumea bifoliata</i> (L.) DC.                     | -                         | Herb  | Therophyte  | Cough (R)                       |
| 447 | * <i>Blumea obliqua</i> (L.) Druce                     | -                         | Herb  | Therophyte  | Wound healing (Wh)              |
| 448 | * <i>Blumea lacera</i> (Burm.f.) DC.                   | -                         | Herb  | Therophyte  | Boils, blisters (L)             |
| 449 | * <i>Blumea virens</i> DC.                             | Adavi pogaku              | Herb  | Therophyte  | Skin disease (L)                |
| 450 | * <i>Chromolaena odorata</i> (L.)<br>R.M.King & H.Rob. | Porangi, juttu<br>puvvu   | Shrub | Chamaephyte | Hemostatic, wound healing (L)   |
| 451 | * <i>Cyanthillium cinereum</i> (L.)<br>H.Rob           | Garita kamma,<br>sahadevi | Herb  | Therophyte  | Diaphoretic (L)                 |
| 452 | * <i>Eclipta prostrata</i> (L.) L.                     | Gunta galagara            | Herb  | Therophyte  | Hair dye (L)                    |
| 453 | <i>Elephantopus scaber</i> L.                          | Enugu thamara             | Herb  | Therophyte  | Wound healing (Wh)              |
| 454 | <i>Pentanema indicum</i> (L.) Ling.                    | Adavi chamanthi           | Herb  | Therophyte  | Abortifacient (R)               |
| 455 | <i>Sphaeranthus indicus</i> L.                         | Bodasaram                 | Herb  | Therophyte  | Anti-lice in domestic fowl (Wh) |
| 456 | * <i>Synedrella nodiflora</i> (L.) Gaertn.             | Mudi puvalu chettu        | Herb  | Therophyte  | Epilepsy (L)                    |
| 457 | * <i>Tridax procumbens</i> (L.) L.                     | Nallaalam                 | Herb  | Therophyte  | Hemorrhage, cuts (L)            |
| 458 | * <i>Vernonia abyssinica</i> Sch.Bip. ex<br>Walp.      | -                         | Herb  | Therophyte  | Wound healing (Wh)              |
| 459 | * <i>Vernonia arborescens</i> (L.) Sw.                 | Sahadevi                  | Herb  | Therophyte  | Fever (L)                       |

|                         |                                                                       |                             |        |                 |                                     |
|-------------------------|-----------------------------------------------------------------------|-----------------------------|--------|-----------------|-------------------------------------|
| 460                     | * <i>Vernonia cinerea</i> var. <i>parviflora</i><br>(Reinw. ex Blume) | Sahadevi                    | Herb   | Therophyte      | Fever (R)                           |
| 461                     | * <i>Xanthium strumarium</i> L.                                       | Marula matangi              | Herb   | Therophyte      | Galactagogue (L)                    |
| <b>PTERIDOPHYTA</b>     |                                                                       |                             |        |                 |                                     |
| <b>Lygodiaceae</b>      |                                                                       |                             |        |                 |                                     |
| 462                     | <i>Lygodium flexuosum</i> (L.) Sw.                                    | Dayyapu jeda,<br>meka sannu | Twiner | Chamaephyte     | Skin disease (Wh)                   |
| <b>Marsileaceae</b>     |                                                                       |                             |        |                 |                                     |
| 463                     | <i>Marsilea quadrifolia</i> L.                                        | Chukkaku                    | Herb   | Hemicryptophyte | Diuretic (Wh)                       |
| <b>Pteridaceae</b>      |                                                                       |                             |        |                 |                                     |
| 464                     | <i>Adiantum lunulatum</i> Burm.f.                                     | Hamsapadi                   | Herb   | Hemicryptophyte | Dysentery, epileptic fits (Wh)      |
| 465                     | <i>Ceratopteris thalictroides</i> (L.)<br>Brongn.                     | Medha                       | Herb   | Hemicryptophyte | Memory (L)                          |
| 466                     | <i>Pteris multifida</i> Poir.                                         | -                           | Herb   | Hemicryptophyte | Dysentery (Rh)                      |
| 467                     | <i>Pteris vittata</i> L.                                              | -                           | Herb   | Hemicryptophyte | Wound healing (Wh)                  |
| <b>Selaginellaceae</b>  |                                                                       |                             |        |                 |                                     |
| 468                     | <i>Selaginella involvens</i> (Sw.) Sw.                                | Pitta kalu chettu           | Herb   | Hemicryptophyte | Memory (Wh)                         |
| 469                     | <i>Selaginella bryopteris</i> (L.) Baker                              | Pitta kalu chettu           | Herb   | Hemicryptophyte | Memory (Wh)                         |
| <b>Thelypteridaceae</b> |                                                                       |                             |        |                 |                                     |
| 470                     | <i>Cyclosorus parasiticus</i> (L.)<br>Farwell                         | Hamsa padu                  | Herb   | Hemicryptophyte | Evil spirits, mental disorders (Rh) |

T-Tuber, Sh-Shoot, Wh-Whole plant, W-Wood, F-Fruit, S-Seed, Sb-Stem bark, B-Bulb, R-Root, Rh-Rhizome, Fl-Flower, L-Leaf, St-Stem, La-Latex, K-Kernel, Ps-Pseudocarp, Fp-Fruit pulp, Br-Branch, C-Corolla, Lb-Leaf bud, Pb-Pseudobulb, I-Inflorescence, † = Cultivated; \* = Exotic, Naturalized; # = Planted; ¥ = R\_wild. **Note:** Meso- and Microphanerophytes are clubbed as 'Phaneropytes', as the height classes are not very distinct in the study area. The families of Magnoliophyta are arranged as per the APG III linear sequence<sup>16,17</sup> and those of Pteridophyta alphabetically.
